# Supplementary material
Source: PubMed Central journal article supplement (PMC2435127)

Supplementary  
Figure 1

*K19-C2mE*

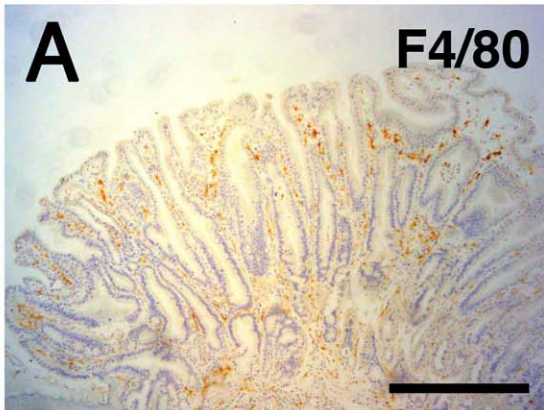

*K19-C2mE op/op*

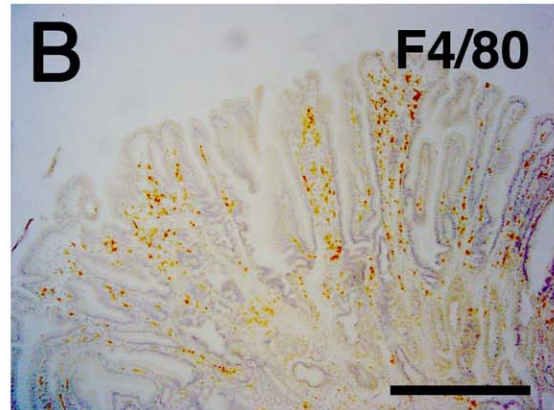

## Supplementary Figure 2

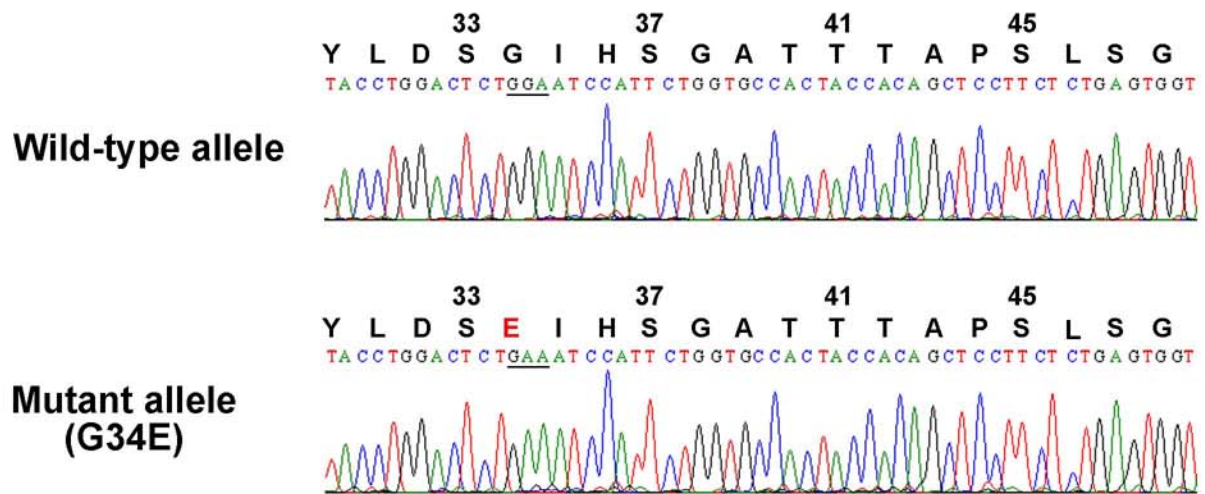

Supplementary  
Figure 3

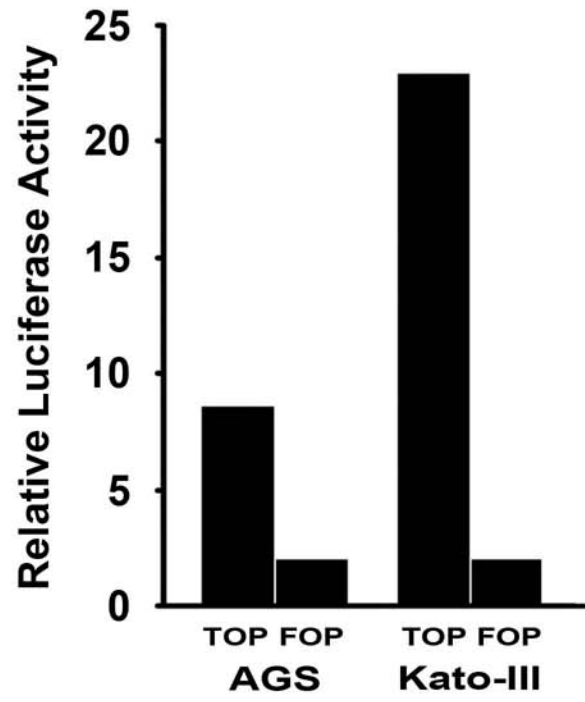

# Supplementary Figure 4

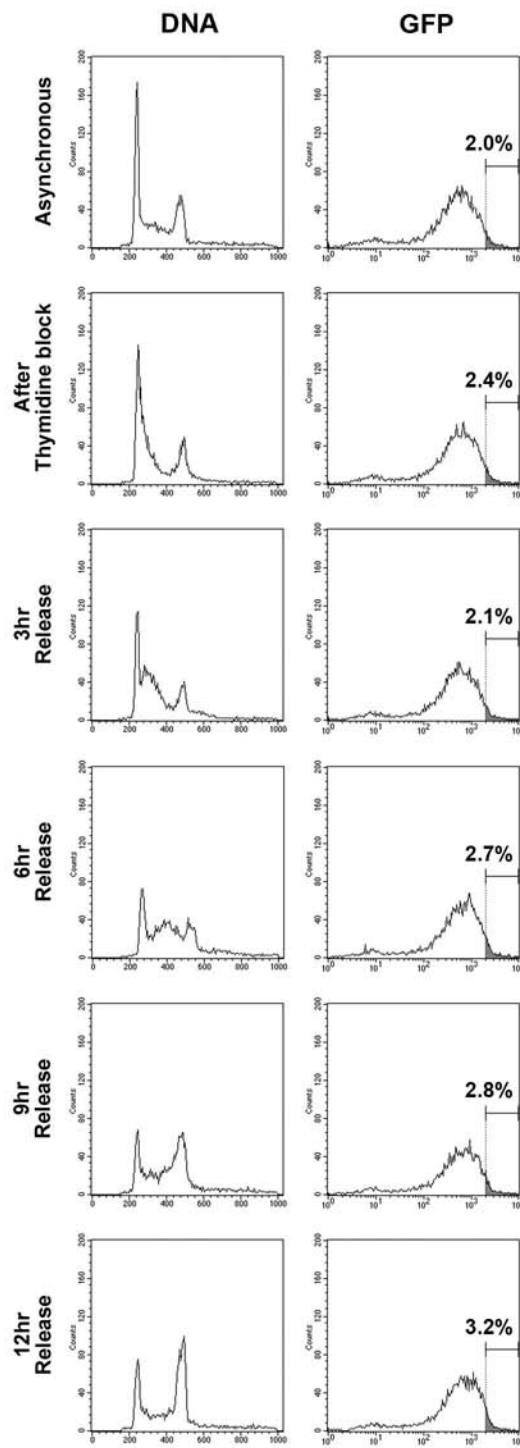

Supplementary  
Figure 5

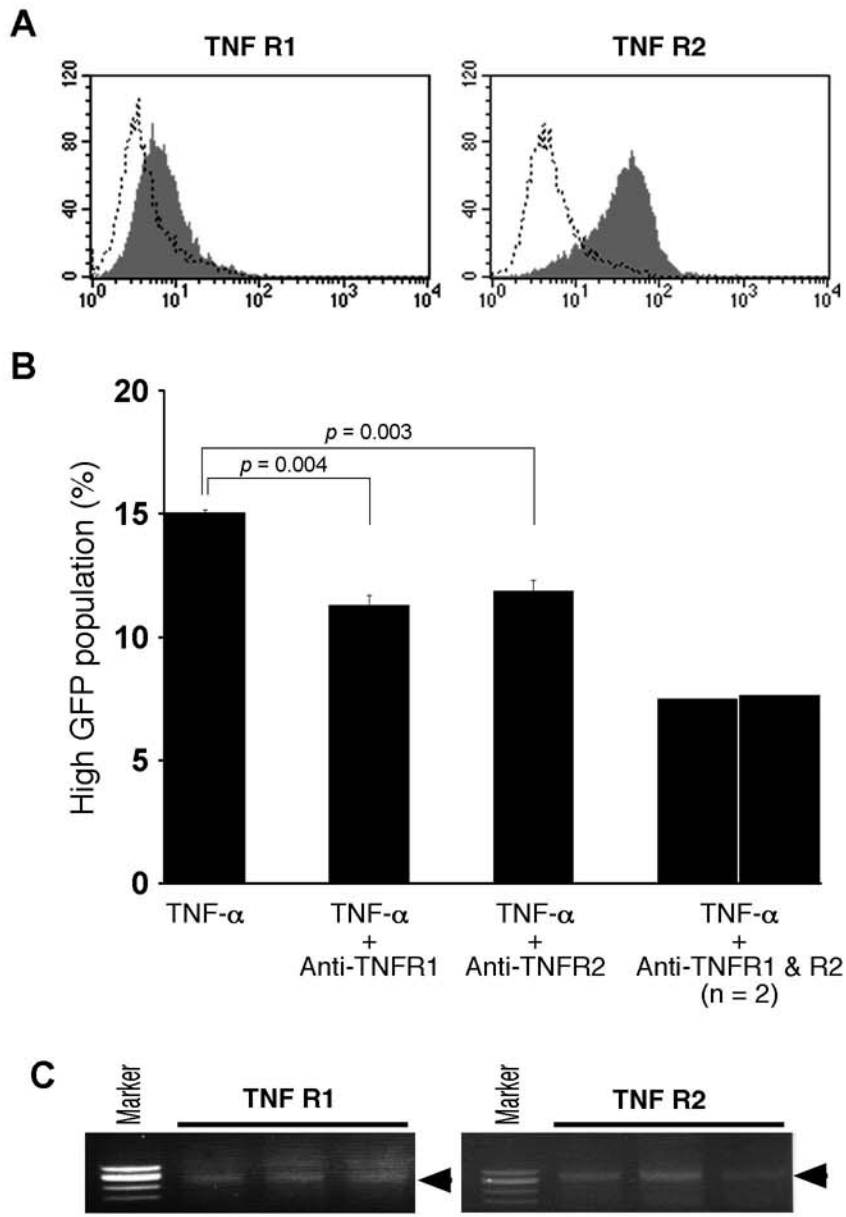

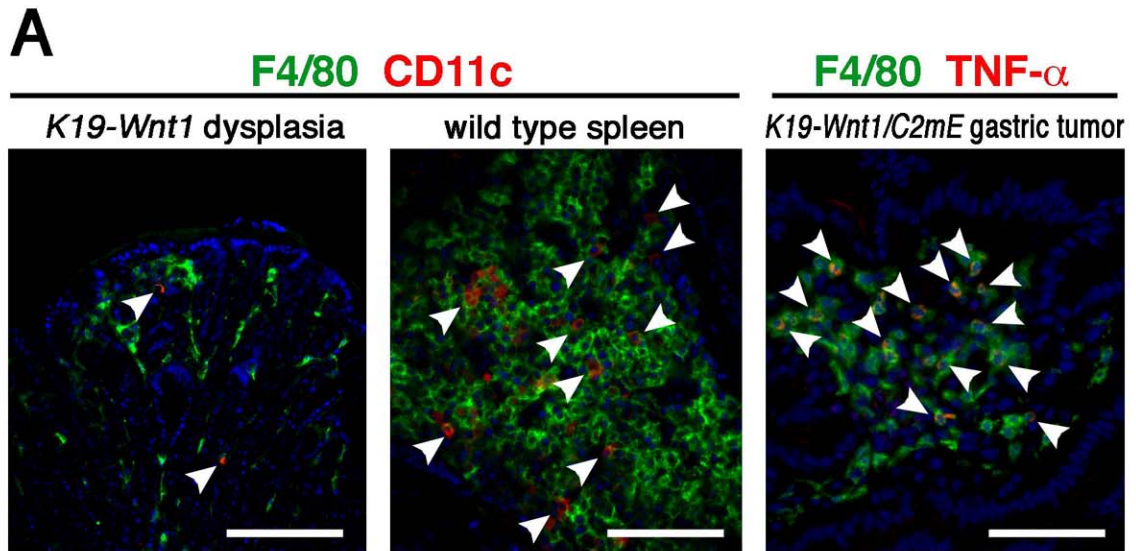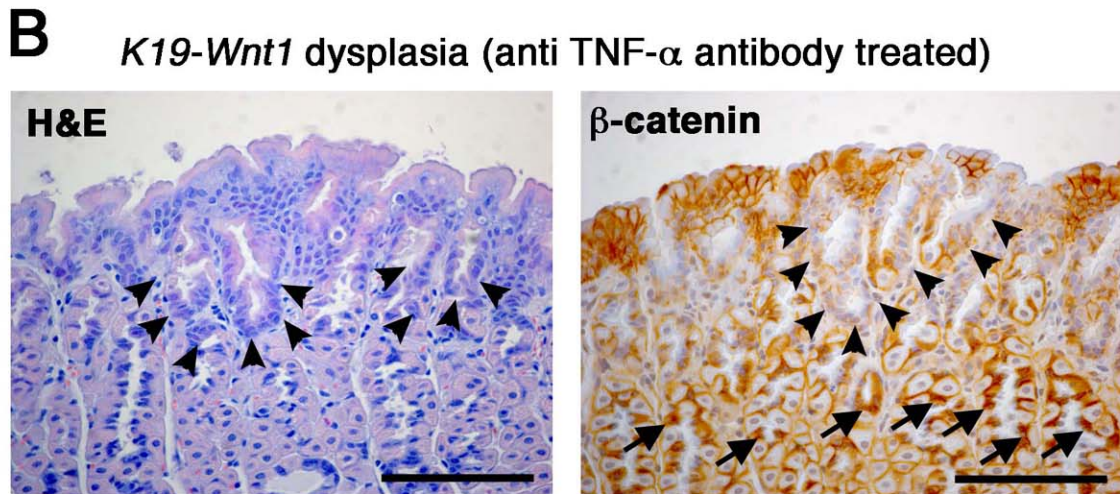

# Supplementary Figure 7

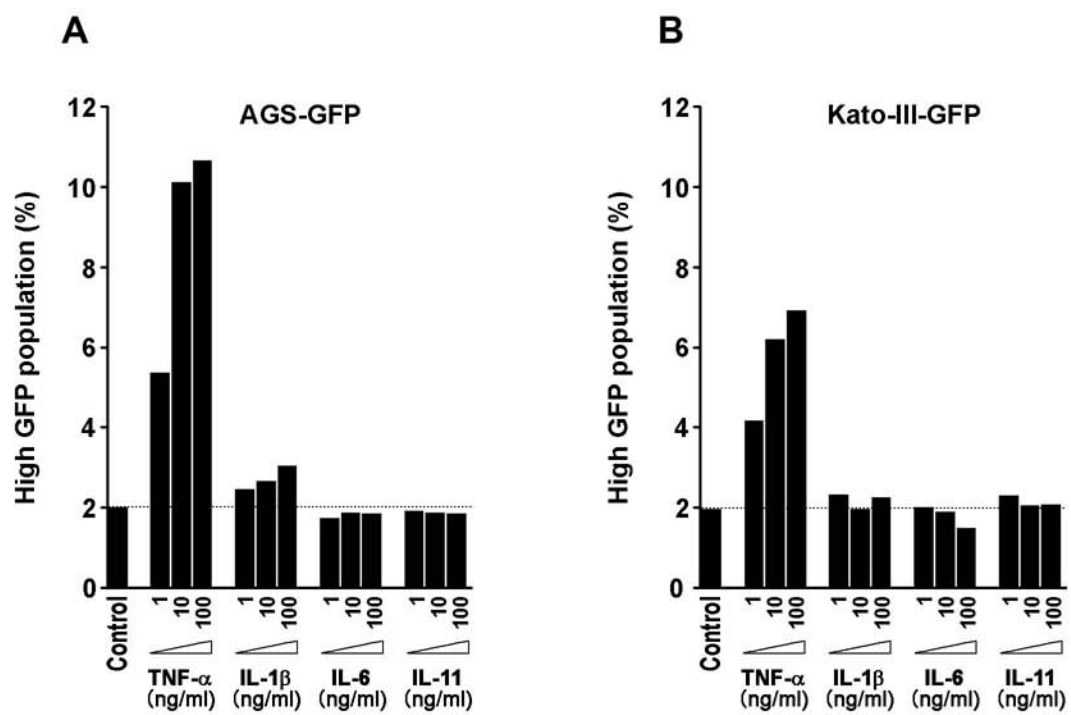

Supplement: emboj2008105s1.pdf [file emboj2008105s1.pdf]
